1 **Paralogues of the *PXY* and *ER* receptor kinases enforce radial patterning in plant vascular tissue.**

2 Ning Wang<sup>123†</sup>, Kristine S. Bagdassarian<sup>1†</sup>, Rebecca E. Doherty<sup>1†</sup>, Xiao Y. Wang<sup>45</sup>, Johannes T. Kroon<sup>1</sup>,  
3 Wei Wang<sup>2</sup>, Ian H. Jermyn<sup>6</sup>, Simon R. Turner<sup>4</sup> and J. Peter Etchells<sup>1\*</sup>

4

5 1. Department of Biosciences, Durham University, South Road, Durham, DH1 3LE, UK

6 2. College of Life Science, Henan Agricultural University, 95 Wenhua Road, Zhengzhou 450002, China

7 3. Current Address: School of Life Science, Beijing Institute of Technology, 5 South Zhongguancun  
8 Street, Haidian District, Beijing, P.R.C., Postcode: 100081.

9 4. Faculty of Biology, Medicine & Health, University of Manchester, Manchester, United Kingdom,  
10 M13 9PT

11 5. Current Address: Department of Plant Sciences, University of Cambridge, Downing Street,  
12 Cambridge, CB2 3EA

13 6. Department of Mathematical Sciences, Durham University, South Road, Durham, DH1 3LE, UK

14 \*Author for correspondence

15 †Equal contribution

16

17 **Number of Figures: 8**

18 **Number of Tables: 0**

19 **Word Count: 7149**

20

21 **Abstract**

22 Plant cell walls do not allow cells to migrate, thus plant growth and development is entirely the  
23 consequence of changes to cell division and cell elongation. Where tissues are arranged in  
24 concentric rings, expansion of inner tissue, such as that which occurs during vascular development,  
25 must be coordinated with cell division and/or expansion of the outer tissue layers, endodermis,  
26 cortex, and epidermis, in order for tissue integrity to be maintained. Little is known of how  
27 coordination between cell layers occurs, but non-cell autonomous signalling could provide an  
28 explanation. Endodermis-derived EPIDERMAL PATTERNING FACTOR-LIKE (EPFL) ligands have been  
29 shown to signal to the ERECTA (ER) receptor kinase present in the phloem. *ER* interacts with  
30 *PHLOEM INTERCALLATED WITH XYLEM (PXY)*, a receptor present in the procambium. The PXY ligand,  
31 TRACHEARY ELEMENT DIFFERENTIATION INHIBITORY FACTOR (TDIF) is derived from *CLE41* which is  
32 expressed in the phloem. These factors therefore represent a mechanism by which intertissue  
33 signalling could occur to control radial expansion between vascular and non-vascular tissue in plant  
34 stems. Here we show that *ER* regulates expression of *PXY* paralogues, *PXL1* and *PXL2*, and that in  
35 turn *PXY*, *PXL1* and *PXL2* together with *ER*, regulate the expression of *ERL1* and *ERL2*, genes  
36 paralogous to *ER*. *PXY*, *PXL1*, *PXL2* and *ER* also regulate the expression of ER-ligands. Genetic analysis  
37 of these six receptor kinase genes demonstrated that they are required to control organisation,  
38 proliferation and cell size across multiple tissue layers. Taken together, our experiments  
39 demonstrate that ER signalling attenuates *PXL* expression in the stem, thus influencing vascular  
40 expansion and patterning. We anticipate that similar regulatory relationships, where tissue growth is  
41 controlled via cell signals moving across different tissue layers, will coordinate tissue layer expansion  
42 throughout the plant body.

43

## 44 Introduction

45 Cell migration is fundamental to development of animal body plans. By contrast, plant cell walls do  
46 not allow cells to migrate and consequently plant growth and development is entirely a result of  
47 differential growth. As such, initiation and elaboration of plant organs occurs via coordinated  
48 changes to the orientation and occurrence of cell divisions, and by cell expansion. In embryos,  
49 pattern is established early in development. 28-cell embryos have already specified the provascular  
50 tissue which consists of four cells the centre of the embryo, a layer of endodermal tissue which  
51 surrounds the provascular, and an outer layer of epidermal cells (ten Hove et al., 2015). Extra  
52 tissue types are subsequently specified via specific rounds of asymmetric cell divisions (Kajala et al.,  
53 2014) such that in the dicot hypocotyl, the tissue pattern along the radial axis is epidermis-cortex-  
54 endodermis-pericycle-phloem-cambium-xylem. The hypocotyl maintains a similar pattern  
55 throughout the life of the plant (Chaffey et al., 2002), with the exception of the epidermis and  
56 cortex, which are replaced by periderm as the hypocotyl expands (Wunderling et al., 2018). Thus,  
57 coordination of tissue expansion must occur as organs increase in size. This occurs both at the level  
58 of cell division, where cell number increases from tens to hundreds to thousands of cells, and at the  
59 level of cell size, which in differentiated cells differs according to function.

60 Little is known about how patterns are maintained through very large increases in plant size.  
61 However, evidence points to the presence of mechanisms that coordinate the order of tissue layers.  
62 In the Arabidopsis root, removal of the root tip results in a reorganisation of the organ to enable the  
63 formation of a new meristem. Strikingly, stable patterning of tissue layers is established in the  
64 reorganised tissue separately from the activity of the stem cell niche. This suggests that tissue layer  
65 organisation is independent of stem cell growth (Efroni et al., 2016). Non-cell autonomous signalling  
66 represents one mechanism through which tissue layer organisation could be coordinated. A ligand  
67 secreted by one tissue could provide positional information to a receptor located in an adjacent cell  
68 type. Ligand-receptor pairs that signal between tissue layers and are required for tissue layer  
69 organisation have been described. For example, in microsporangial patterning, TAPETUM  
70 DETERMINANT1 (TPD1) ligand is excreted from microsporocytes and perceived by the EXCESS  
71 MICROSPOROCTES 1 (EMS1) receptor, present in adjacent locular peripheral cells which, in turn, go  
72 on to form the tapetum (Jia et al., 2008). The consequences of disrupting this interaction includes  
73 disruption of the integrity of the tapetal cell layer and changes to the orientation of cell division  
74 (Feng and Dickinson, 2010).

75 In vascular development, spatially separate ligands and receptors are also required to regulate  
76 vascular organisation. TRACHEARY ELEMENT DIFFERENTIATION INHIBITORY FACTOR (TDIF) ligand is  
77 encoded for by three genes, *CLAVATA3-LIKE/ESR-RELATED 41 (CLE41)*, *CLE42* and *CLE44*. It is  
78 excreted from the phloem and perceived by the PHLOEM INTERCALLATED WITH XYLEM/TDIF  
79 receptor (PXY/TDR) receptor, which is cambium-expressed. The consequence of loss of the TDIF-PXY  
80 interaction is loss of organised tissue layers characterised by disruption to the spatial separation of  
81 xylem, cambium, and phloem. Loss of PXY also results in reductions in cell division in the cambium,  
82 and premature xylem differentiation (Etchells and Turner, 2010; Fisher and Turner, 2007; Hirakawa  
83 et al., 2008; Ito et al., 2006). TDIF-PXY interacts with a second ligand-receptor pair to maintain the  
84 spatial separation of tissues in the vasculature. In stems, the *ERECTA (ER)* receptor is expressed in  
85 the phloem, and its cognate ligands, *CHALLAH-LIKE 2/EPIDERMAL PATTERNING FACTOR-LIKE 4*  
86 (*CLL2/EPFL4*) and *CHALLAH (CHAL/EPFL6)* are expressed in the endodermis (Abrash et al., 2011;  
87 Uchida et al., 2012). *pxy er* mutant stems show organisation defects greater than those of *pxy* single  
88 mutants (Etchells et al., 2013). Thus the genetic interaction between EPFL-ER and TDIF-PXY

89 represents a non-cell autonomous signalling system that organises tissue layers between  
90 endodermis, phloem, cambium and xylem (Figure 1B). In hypocotyls, *ER* expression is reported to be  
91 much broader (Ikematsu et al., 2017), but nevertheless changes to organisation of vascular tissues in  
92 *er pxy* hypocotyls are also apparent (Etchells et al., 2013).

93 In the *Arabidopsis* genome, both *PXY* and *ER* paralogues are present. The *PXY* family, hereafter  
94 referred to as *PXf* is constituted of *PXY*, *PXY-LIKE1* (*PXL1*), and *PXY-LIKE2* (*PXL2*). *pxl1* and *pxl2*  
95 enhance the vascular organisation defects that are characteristic of *pxy* mutants (Etchells et al.,  
96 2013; Fisher and Turner, 2007). The *ER* paralogues are *ER-LIKE1* (*ERL1*) and *ERL2* (Shpak et al.,  
97 2004). The *ERECTA* family (*ERf*) have wide ranging roles in regulation of plant growth and  
98 development. Redundantly, these three genes function in cell elongation, cell division, inflorescence  
99 architecture (Shpak et al., 2004; Torii et al., 1996), floral patterning (Bemis et al., 2013), shoot apical  
100 meristem fate (Kimura et al., 2018; Uchida et al., 2013), and stomatal spacing (Shpak et al., 2005). In  
101 the context of plant vascular development, they regulate vascular expansion in the stem (Uchida  
102 and Tasaka, 2013) and hypocotyl where they control the timing of xylem fibre formation, and levels  
103 of radial growth (Ikematsu et al., 2017; Ragni et al., 2011). A hallmark of loss of *ERf* genes is an  
104 increase in cell size, particularly with respect to the radial axis (Shpak et al., 2004; Shpak et al.,  
105 2003).

106 In this paper we investigated the coordination between tissue layers required for plant growth and  
107 development. In particular we examined the mechanism by which *PXY* and *ER* signalling coordinates  
108 development between vascular and non-vascular cell types. We found that in *Arabidopsis*, *ER*  
109 together with members of the *PXf* family coordinate the expression of *ERL1*, *ERL2*, *EPFL4* and *EPFL6*.  
110 The observation that vascular-expressed *PXY* and *ER* regulate the expression of non-vascular-  
111 expressed *EPFL4* and *EPFL6* in stems, demonstrates coordination of growth regulators between  
112 vascular and non-vascular tissue layers. To understand *ERf* function in the context of *PXY* signalling,  
113 we generated *pxy pxl1 pxl2 er erl1 erl2* sextuple mutants using a combination of classical genetics  
114 and genome editing. Analysis of these lines demonstrated that the *PXf* and *ERf* interact to coordinate  
115 tissue integrity at the levels of both cell size, and cell division. Our results demonstrate that *PXf* and  
116 *ER* together control tissue growth via coordination of gene expression between vascular and non-  
117 vascular cell types.

## 118 **Materials and Methods**

### 119 **Accession numbers**

120 AGI accession numbers for the genes studied in this manuscript: At3g24770 (*CLE41*), At5g61480  
121 (*PXY*), At1g08590 (*PXL1*), At4g28650 (*PXL2*), At2g26330 (*ER*), At5g62230 (*ERL1*), At5g07180 (*ERL2*),  
122 At4g14723 (*CLL2/EPFL4*), At3g22820 (*CLL1/EPFL5*), At2g30370 (*CHAL/EPFL6*).

### 124 **Gene expression**

125 For qRT-PCR, RNA was isolated using Trizol reagent (Life Technologies) prior to DNase treatment with  
126 RQ1 (Promega). cDNA synthesis was performed using Tetro reverse transcriptase (BioLone). All  
127 samples were measured in technical triplicates on biological triplicates. qPCR reactions were  
128 performed using qPCRBIO SyGreen Mix (PCR Biosystems) using a CFX Connect real time system (Bio-  
129 Rad) with the standard Sybr Green detection programme. A melting curve was produced at the end  
130 of every experiment to ensure that only single products were formed. Gene expression was  
131 determined using a version of the comparative threshold cycle (Ct) method using average  
132 amplification efficiencies of each target as determined using LinReg PCR software (Ramakers et al.,

133 2003)). Samples were normalised to *18S* rRNA or *ACT2*. Primers for qRT-PCR are described in Table  
134 S1. Significant differences in gene expression were identified with ANOVA and LSD post-hoc test.

135

### 136 **Plant lines**

137 Previously described parental lines *pxy-3 pxl1-1 pxl2-1* (referred to hereafter as *erf*) and *pxy-5 er-124*  
138 (Etchells et al., 2013) were crossed to generate *pxy-3 pxl1-1 pxl2-1 er-124 (er pxf)*. The quadruple  
139 mutants were selected in the F3 by PCR using primers listed in Table S1. To generate *pxF er erl2*  
140 quintuple mutants, parental lines *erl1, er-105 erl1-2/+ erl2-1* (Shpak et al., 2004) and *pxy-3 pxl1-1*  
141 *pxl2-1* (Etchells et al., 2013) were crossed. Plants homozygous for *er* were selected by visual  
142 phenotype in the F2, which was also sprayed with glufosinate to select for plants carrying an *erl2-1*  
143 allele. Families homozygous for glufosinate resistance in the F3 were screened for *pxy-3, pxl1-1* and  
144 *pxl2-1* to generate *pxf er erl2. er* and *erl2* mutants were subsequently confirmed by PCR.

145 *erl1* genome edited lines were generated using an egg cell specific CRISPR/Cas9 construct (Wang et  
146 al., 2015; Xing et al., 2014). Briefly, target sequences TCCAATTGCAGAGACTTGCAAGG and  
147 TCTTGCTGGCAATCATCTAACGG were identified using the CRISPR-PLANT website (Xie et al., 2014)  
148 and tested for off-targets (Bae et al., 2014). Primers incorporating the target sequences (Table S1)  
149 were used in a PCR reaction with plasmid pCBC-DT1T2 as template to generate a PCR product  
150 incorporating a guide RNA against *ERL1*. A golden gate reaction was used to incorporate the purified  
151 PCR product into pHEE2E-TRI. The resultant *ERL1* CRISPR/cas clone was transferred to Arabidopsis by  
152 floral dip (Clough and Bent, 1998). *erl1<sup>GE</sup>* mutants were selected in the T1 generation by sequencing  
153 PCR products generated from primers specific to *ERL1* genomic DNA that flanked the guide RNA  
154 target sites.

155 For spatial expression of *ERf* genes in *pxy* or *er*, previously described *ER::GUS, ERL1::GUS* and  
156 *ERL2::GUS* reporters were used (Shpak et al., 2004) which were crossed to *pxy-3* or *er-124*. *pxy*  
157 mutants were selected in the F2 using primers described Table S1. Reporter lines were picked which  
158 also demonstrated GUS expression as judged by GUS histochemical staining, and the presence of  
159 GUS reporter construct was subsequently confirmed by PCR using primers described in Table S1.

160 *Nicotiana benthamina* lines overexpressing *AtCLE41* were generated by transforming a previously  
161 described *35S::AtCLE41* binary plasmid (Etchells and Turner, 2010) using the method described by  
162 Horsh (Horsch et al., 1985).

163

### 164 **Analysis of vascular tissue anatomy**

165 Vascular morphology was assessed using tissue embedded in JB4 resin. For vascular bundles,  
166 inflorescence stem tissue from 0.5 cm above the rosette was assessed. Tissue was fixed in FAA,  
167 dehydrated in ethanol and infiltrated with JB4 infiltration medium, prior to embedding. 4 µM  
168 sections, taken using a Thermo Fisher Scientific Finesse ME 240 microtome were stained in 0.02%  
169 aqueous toluidine blue and mounted with histomount.

170 GUS stained tissue was harvested to cold phosphate buffer on ice. Samples were treated with ice-  
171 cold acetone for 5 minutes and then returned to phosphate buffer. GUS staining buffer (50 mM  
172 phosphate buffer, 0.2% triton, 2 mM potassium ferrocyanide, 2 mM potassium ferricyanide, 2 mM  
173 X-Gluc) was added and samples were infiltrated using a vacuum, before incubation overnight at  
174 37°C. Samples were progressively incubated in: FAA, 70%, 85%, 95% EtOH for 30 minutes each prior  
175 to embedding in Technovit 7100 according to the manufacturer's instructions. Embedded samples  
176 were allowed to polymerize at room temperature for two hours and at 37°C overnight until solid.

177 The inhibition layer was removed by wiping with a lint-free cloth. Samples were sectioned, counter-  
178 stained with 0.1% neutral red and mounted using histomount.

179

## 180 **Quantitative morphology calculations**

181 Images of five-week old wild type *pxF* and *pxF erl2* hypocotyls were used. Images from 6 different  
182 individuals were selected for each genotype tested. From each image, a minimum of 10 cells of each  
183 cell type (xylem vessels, xylem fibers, phloem and parenchyma) were selected from a wedge with a  
184 60 degree central angle (Figure S1A). A MATLAB code was generated to extract the intrinsic  
185 properties of each cell type. To that end, the code was designed to split each image into binary sub-  
186 images, wherein the interior of the cell type of interest was represented as white objects on black  
187 background (Figure S1B). The cells from each image were then analysed as connected components  
188 of the image and their area, perimeter and ellipticity (calculated as the ratio of major to minor axis)  
189 extracted. To remove noise, i.e. data obtained from objects which were wrongly classified as  
190 connected components within the algorithm (e.g. stray pixels), the code was devised to discard data  
191 outside the range of pre-specified number of standard deviations from the mean. The number of  
192 standard deviations differed between the different genotypes and was selected on a trial-and-error  
193 basis, by referring back to the original images, with the objective of maintaining the maximum  
194 number of viable data points (2-3 standard deviations for xylem cells, 1.4-1.6 standard deviations for  
195 fibre cells, 3 standard deviations for all other cell types). The data was converted from pixels to  
196 microns using a calibration factor, in order to yield results consistent with laboratory observations.

197 To test the significance of the variation between the cell areas and perimeters between the different  
198 genotypes, a Lilliefors test was performed which determined that the data was normally distributed  
199 at the 5% significance level, allowing for the subsequent use of a nested ANOVA in R. To perform the  
200 nested ANOVA, the data was classified according to the treatment (i.e. genotype) and plant ID within  
201 that treatment, with the response variable either the area or perimeter. Following the results of the  
202 nested ANOVA, a post-hoc Tukey HSD test was performed to determine the significance of the  
203 pairwise differences between the means of the areas/perimeters within each genotype. Due to the  
204 varying number of cells for each genotype, the histogram and boxplot data representations were  
205 derived from a random sample for each cell type, where a maximum number of representatives  
206 from each genotype were selected. For each genotype, the MATLAB code was designed to randomly  
207 select 70 xylem cells, 340 fibre cells, 200 phloem cells, 320 parenchyma cells.

208 Mean hypocotyl area was calculated from images of six plants of each genotype. A MATLAB code  
209 was used to measure the length of the shorter and longer radius from each image (one radius at 12  
210 or 6 o'clock and one radius at 3 or 9 o'clock, as appropriate). The length of the radii in pixels was  
211 subsequently converted to microns and the formula for the area of ellipse ( $A = r_1 * r_2 * \pi$ ) used to  
212 calculate the area of each hypocotyl. A Lilliefors test at 5% significance level was used to confirm  
213 that the areas for each genotype were normally distributed. A one-way ANOVA was performed to  
214 establish the existence of significant variation between the areas of the different genotypes,  
215 followed by a post-hoc Tukey HSD test to gain insight into the pairwise variation between the  
216 means.

217

## 218 **Results**

### 219 **PXL1 and PXL2 are regulated by ER in the stem but not in the hypocotyl.**

220 *pxy* mutants demonstrate radial patterning defects including intercalation of vascular cell types  
221 (Fisher and Turner, 2007). These defects are enhanced by mutations at the *ER* locus (Etchells et al.,

222 2013). ER ligands, EPFL4 and EPFL6 (Abrash et al., 2011), are expressed outside of the vascular  
223 cylinder, in the endodermis. ER is expressed in the phloem (Uchida et al., 2012). TDIF encoding  
224 genes, CLE41, CLE42 and CLE44, are expressed in the phloem, and TDIF signals to PXY which is  
225 expressed in the procambium (Etchells and Turner, 2010; Fisher and Turner, 2007; Hirakawa et al.,  
226 2008). Therefore, PXY and ER constitute a mechanism by which coordination of radial expansion  
227 between vascular and non-vascular tissues could occur (Figure 1A-B). To explore the interaction  
228 between PXY and ER, we sought to determine whether ER signalling could regulate PXY signalling  
229 and/or vice-versa at the level of gene expression. We have previously shown that ER does not  
230 regulate expression of CLE41, CLE42 and CLE44 (Etchells et al., 2013). Consequently we asked  
231 whether ER might regulate expression of the Pxf family of receptors. qRT-PCR was used to test levels  
232 of Pxf gene expression in stems and hypocotyls of wild type and er in 5 week old plants. In  
233 hypocotyls, the level of Pxf gene expression was unchanged in er mutants compared to wild type  
234 (Figure S2A). By contrast, PXL1 and PXL2 expression, but not that of PXY was found to be elevated in  
235 er mutant stems (Figure 1C). These observations suggest that ER signalling may regulate vascular  
236 development by setting PXL1 and PXL2 levels in the stem. To determine the function of PXL1 and  
237 PXL2 regulation by ER, specifically in the context of the ER-PXY interaction, er pxf quadruple mutants  
238 (er pxy pxl1 pxl2) were generated.

239 In previous studies, when pxf plants were compared to pxy single mutants, vascular organisation  
240 defects were enhanced (Fisher and Turner, 2007), but hypocotyl radial expansion and the number of  
241 cells per vascular bundle did not differ between pxy and pxf (Etchells et al., 2013). Here, in  
242 inflorescence stems, er pxf lines had considerably fewer cells per vascular bundle than either pxf or  
243 er counterparts (Figure 1D; Table S2). Therefore PXL1 and PXL2 do function redundantly with ER to  
244 regulate vascular proliferation. Furthermore, a similar reduction in proliferation was observed in the  
245 hypocotyl. Here, although PXL1 and PXL2 expression was unaffected in er mutants (Figure S2), the  
246 diameter of er pxf quadruple mutant hypocotyls was nevertheless significantly smaller than controls  
247 (Figure S2B; Table S2).

248 While changes to vascular proliferation were apparent in er pxf inflorescence stems, by far the most  
249 dramatic defect was observed in when vascular bundle shape was assessed (Figure 1D-E). Typically  
250 in Arabidopsis stems the distribution of vascular bundles is such that there is a greater distribution of  
251 vascular tissue along radial axis of the stem than along the tangential. We measured the ratio of  
252 tangential:radial length of wild type vascular bundles to be 0.61, and in pxf lines this ratio rose to  
253 0.91 (Figure 1F-I; Table S2). We have previously shown that in pxy er stems this ratio is 1.36 (Etchells  
254 et al., 2013). In er pxf stems a dramatic redistribution of vascular cell types along the radial axis was  
255 observed when compared to all other lines tested, such that the ratio of tangential:radial length of  
256 vascular tissue was 2.30 (Figure 1E-I; Table S2). In some plant stems this led to an almost complete  
257 ring of vascular tissue, with phloem cells scattered around the circumference of the vascular cylinder  
258 (arrows in figure 1I), rather than present in discrete vascular bundles. Thus PXL1 and PXL2 are critical  
259 in regulating radial pattern, particularly in the absence of ER and PXY, and these data support the  
260 idea that ER and Pxf constitute a mechanism for organising layers of cell types within the  
261 vasculature.

262

### 263 **Co-regulation of ERf expression by ER and PXL.**

264 Having observed that Pxf genes were differentially expressed in er mutants, and that PXL1 and PXL2  
265 contribute to the control of radial pattern, we also sought to determine whether members of the ER  
266 gene family might also be regulated by ER, or indeed by the Pxf. ER expression levels in stems and

267 hypocotyls of *pxf* lines did not differ from wild type, as determined by qRT-PCR. Expression levels of  
268 *ERL1* and *ERL2* did not differ significantly in neither *er* mutants nor in *pxf* triple mutant stems  
269 compared to wild type (Figure 2A-C). By contrast, *ERL1* expression was reduced in *er pxf* lines  
270 compared to *er* single mutants. Thus *ERL1* expression is maintained by an interaction between *PXf*  
271 and *ER* in stems (Figure 2A), and as such this interaction is required to maintain the requisite level of  
272 *Erf* signalling.

273 In hypocotyls, *ERL1* acts redundantly with *ER*, negatively regulating hypocotyl growth and the timing  
274 of xylem fibre differentiation (Ikematsu et al., 2017). *ERL2* has not been assigned a function in  
275 hypocotyl development as its expression has been reported as absent from hypocotyls in 9 day old  
276 seedlings and 3 week old plants (Ikematsu et al., 2017; Uchida et al., 2013). To understand how *PXY*  
277 and *ER* might influence *Erf* expression, *Erf::GUS* reporter constructs (Shpak et al., 2004) were  
278 crossed into *pxy* and *er* mutants. To our surprise, in 5 week plants we did detect *ERL2::GUS* reporter  
279 expression in the hypocotyls of wild type which, at this growth stage, demonstrated a very similar  
280 pattern to that observed for *ERL1* and *ER*. Thus, *ERL2* expression is a feature of late hypocotyl  
281 development (Figure S3). *ER*, *ERL1* and *ERL2* expression was present in most hypocotyl cell types,  
282 with two maxima; the first in the cambium and xylem initials, and the second in the cortex (Figure  
283 S3A, D, G; arrowheads). No change in the pattern of *ERL1* or *ERL2::GUS* expression was observed in  
284 *er* mutants (Figure S3C, F). However, the clearly defined expression maxima that were observed in  
285 *ER::GUS*, *ERL1::GUS* and *ERL2::GUS* lines in both wild type and *er* mutants, lacked definition in the  
286 absence of *PXY*. Here, for all three reporters expression was observed to be more even across the  
287 hypocotyl (Figure S3B, E, H), possibly due to the changes in vascular organisation in *pxy* mutants.

288 Having defined the pattern of *Erf* expression, at least in a subset of genotypes, we then sought to  
289 address changes to *Erf* expression levels. In common with our observation in the stem, hypocotyl  
290 *ERL1* and *ERL2* expression did not differ between wild type, *er*, and *pxf* lines as determined by qRT-  
291 PCR. Our expectation was that *Erf* levels would be reduced in *pxf er* hypocotyls, as they were in the  
292 stem (Figure 2A-C), but by contrast, a striking increase in *ERL1* and *ERL2* gene expression was  
293 observed in *pxf er* hypocotyls (Figure 2D-F), and as such, opposite regulation of *ERL1* and *ERL2* by *ER*  
294 and *PXf* genes occurs in the hypocotyls and stem.

295 *EPFL4* and *EPFL6* encode the ligands that signal to ER during vascular development (Uchida and  
296 Tasaka, 2013) and stem elongation (Abrash et al., 2011; Uchida et al., 2012). *EPFL5* genetically  
297 interacts with *EPFL4* and *EPFL6* (Abrash et al., 2011), so these three genes were included in our qRT-  
298 PCR analysis. In hypocotyls, no changes were observed in *EPFL4/5/6* expression levels in *er*, *pxf* or *er*  
299 *pxf* genotypes (Figure S4D-F). However, inflorescence stem expression of *EPFL4* and *EPFL6*, but not  
300 that of *EPFL5*, demonstrated significant reductions in expression in *er pxf* lines (Figure S4A-C). Thus  
301 *PXf* and *ER* interact to control *EPFL* ligand expression in addition to that of their cognate receptors,  
302 *ERL1* and *ERL2*.

303

### 304 **Coordination of hypocotyl size is lost in *PXf Erf* mutants.**

305 The *PXf* promotes radial growth in hypocotyls (Etchells et al., 2013; Fisher and Turner, 2007;  
306 Hirakawa et al., 2008), whereas *ER* and *ERL1* signalling represses it (Ikematsu et al., 2017). Thus our  
307 gene expression data demonstrating that *PXf* plays a part in repression of *ERL* expression in  
308 hypocotyls (Figure 2D-E) is consistent with existing phenotypic data where *PXf* might be expected to  
309 repress expression of negative regulators of hypocotyl radial growth. In addition to repressing radial  
310 growth, *ER* and *ERL1* have also been described as preventing premature fibre formation as *er erl1*  
311 hypocotyls develop fibre cells where parenchyma are present in wild type. *ERL2* is thought not to



312 function in the hypocotyl given its very low expression levels in the early stages of development  
313 (Ikematsu et al., 2017). Prior to addressing the function of elevated *ERL* expression in *pxf er*  
314 hypocotyls, we first sought to verify whether this was indeed the case as we found *ERL2* to be  
315 expressed in hypocotyls at 5 weeks (Figure S3D). We tested if *ERL2* functioned similarly to *ERL1* by  
316 analysing *er erl2* lines. Neither change to fibre formation, nor to hypocotyl radial growth were  
317 observed (Figure S5), thus in contrast to *ERL1* (Ikematsu et al., 2017), a function for *ERL2* in  
318 hypocotyl development is not apparent in an *er erl* double mutant background. To address the  
319 function of the elevated *ERL* expression that was observed in *pxf er*, we generated and analysed *pxf*  
320 *er erl2* quintuple mutants. *pxf er erl2* hypocotyl diameters were dramatically smaller than those of  
321 parental lines (Figure 3), and therefore elevated *ERL2* expression in *pxf er* hypocotyls is required to  
322 maintain hypocotyl growth rates.

323 One common characteristic of mutants with reduced cell division is an increase in cell size, relative  
324 to wild type plants. This compensates for fewer cells, such that final organ size is often similar to that  
325 of wild-type plants (Horiguchi and Tsukaya, 2011). In the course of our analysis, cell sizes and shapes  
326 appeared to differ among our mutant lines, and in particular, cells of *pxf* appeared larger than those  
327 other lines (Figure 4A, B). Consequently, cell morphology was calculated from anatomical sections  
328 (Figure S1A-B). Cell area, perimeter and ellipticity were determined for xylem vessels, fibres,  
329 parenchyma, and phloem cells in wild type, *pxf*, and *pxf er erl2* lines. Xylem vessels and fibres in *pxf*  
330 lines demonstrated increases in cell area, relative to both wild type and *pxf er erl2* plants. The  
331 average area of phloem and parenchyma cells proved not to differ significantly between all the  
332 genotypes tested (Figure 4). Xylem cells are characterised by rigid secondary cell walls, so we  
333 hypothesised that parenchyma may be subject to changes in cell shape to accommodate the  
334 increased xylem cell size. To test this hypothesis, we calculated the ellipticity, of the parenchyma and  
335 other hypocotyl cell types by determining major to minor axis ratios, but this parameter varied little  
336 between genotypes (Figure S1C-F). Finally, we measured the perimeter of each of the four cell types.  
337 In this analysis we determined that the perimeters of xylem vessels, parenchyma, and phloem cells  
338 were significantly larger in *pxf* lines than in wild type (Figure 4; RHS). A near-significant difference ( $p$   
339 = 0.053) was observed in the case of fibres. No differences were observed between wild type and *pxf*  
340 *er erl2* lines. Therefore, in hypocotyls, *pxf* mutants compensate by increasing cell size, but these  
341 cellular changes are entirely dependent on *ER* and *ERL2*. Taken together, *PXY* and *ER* signalling  
342 interact to coordinate organ size, at the levels of cell size, proliferation, and pattern maintenance.

343

#### 344 **Defects of *pxf erf* sextuple mutants**

345 We sought to remove all *PXf* and *ERf* genes to understand any remaining redundancy between these  
346 two gene families. However, *PXY* and *ERL1* are tightly linked on chromosome 5, separated by just  
347 270 Kb. To overcome this linkage we designed a CRISPR/cas9 construct that contained two guide  
348 RNAs against *ERL1* (Figure S6) in order to remove the remaining function *ERf* gene from *pxf er erl2*.  
349 The resulting *pxf erf* sextuple mutants were compared to *pxf er erl2* lines, *erf*, *pxf*, and wild type.  
350 Although gross morphology of *pxf erf* sextuple lines was considerably smaller than *pxf er erl2*  
351 counterparts (Figure S7), inflorescence stem vascular morphology was similar in these two lines  
352 (Figure 5). Both were characterised by a very large reduction in vascular bundle size. Characteristic  
353 xylem and phloem cell types were present, but only very small xylem vessels were observed, relative  
354 to those found in wild type, *erf* and *pxf* lines. Furthermore, tissue layer organisation defects were  
355 apparent beyond those previously observed. In particular the clearly defined organisation of  
356 endodermal and adjacent phloem cap cells was lacking with the phloem cap appearing to extend

357 into the cortex (Figure 5D) or be absent altogether (Figure 5E). Thus organisation defects occurred  
358 out with the vascular cylinder.

359 In hypocotyls, the *pxf erf* sextuple lines were considerably smaller than all other lines tested (Figure  
360 6). During vascular cylinder development in the embryo, the hypocotyl forms in a diarch pattern with  
361 a row of xylem cells that are flanked by two phloem poles (Dolan et al., 1993). As secondary growth  
362 proceeds, this organisation develops radial symmetry with phloem present around the  
363 circumference of the vascular cylinder (Chaffey et al., 2002). Strikingly, development was perturbed  
364 to such a degree in *pxf erf* mutants that the position of the original phloem poles remained  
365 apparent, even after 5 weeks of growth (arrows in figure 6E; Figure S8). This suggests that vascular  
366 development was retarded to such a degree that these plants could not make the transformation to  
367 true radial growth. In wild type and *erf* lines cell divisions were organised (Figure 6A-B; arrowheads),  
368 an aspect of normal vascular development known to perturbed in lines that lack *pxy* and its  
369 paralogues (Figure 6C) (Fisher and Turner, 2007). Recent cell divisions were clearly identifiable in the  
370 absence of the *PXF*, *ER* and *ERL2* and they remained present, albeit lacking orientation and at a much  
371 reduced frequency in *pxf erf* lines (Figure 6D-E). Thus while not an absolute necessity for formation  
372 of either phloem, or xylem vessels, these receptor-kinase families are absolutely essential in  
373 specifying their positioning, and coordinating cell division in a manner that allows organised radial  
374 expansion and pattern maintenance (Figure 6).

375

#### 376 **Radial expansion requires crosstalk between tissue layers.**

377 An interesting aspect of the interaction between *ERf* and *PXf* signalling is that *ER* ligands are  
378 expressed from the endodermis, i.e. from outside the vascular tissues. The observation that *EPFL4*  
379 and *EPFL6* expression is perturbed in *pxf erf* mutant stems demonstrates that such coordination  
380 occurs. In *Arabidopsis* stems there is very limited radial expansion, but not so in stems of *Nicotiana*  
381 *benthamiana*. Here, interfascicular cambium forms close to the top of the stem, which then expands  
382 radially, rather like an *Arabidopsis* hypocotyl, except that endodermal, cortex and epidermal layers  
383 are maintained. Thus with this additional level of complexity, fine-tuning of coordinated tissue layer  
384 expansion may be more susceptible to perturbation. We generated *Nicotiana benthamiana* lines  
385 carrying *AtCLE41*, which encodes for TDIF, under the control of the *35S* promoter (Figure 7). The  
386 phenotypes of these constitutive over-expression lines bore similarities to those described in  
387 *Arabidopsis* plants and aspen trees carrying similar constructs (Etchells et al., 2015; Etchells and  
388 Turner, 2010; Kucukoglu et al., 2017; Strabala et al., 2006). They were characterised by short stature,  
389 characteristic organisation defects in vascular tissue, and stem bases with a larger diameter than  
390 controls (Figure 7A-D). *35S::AtCLE41 Nicotiana* lines were on average 14.4 mm in diameter  
391 compared to 7.6 mm in wild type after 8 weeks of growth. However, in addition to these expected  
392 phenotypes, we observed that outer layers of stem tissue had split resulting in prominent lesions in  
393 outer tissue layers (Figures 7E-H, see red arrows).

394 We tested whether *Nicotiana 35S::AtCLE41* stem lesions were due to large increases in the  
395 deposition of vascular tissue by sectioning stems at the site of the split. We observed that the split  
396 extended through the outer cell layers, i.e. the epidermis and cortex, but did not extend into the  
397 vascular cylinder, thus, in *35S::AtCLE41 Nicotiana* lines the vascular cylinder expands at a greater  
398 rate than surrounding tissue, such that lesions develop. This demonstrates that patterning and  
399 expansion must be coordinated between the vascular cylinder and outer cell layers for maintenance  
400 of tissue integrity during radial growth. It suggests that attenuation of TDIF-PXY signalling may be  
401 part of this coordination process. One possibility is that this occurs by ER acting on PXY paralogues.

402

## 403 Discussion

404 Plant growth and development requires coordination between expanding tissue layers, particularly  
405 where tissue types are organised in concentric rings. Clearly, expansion of inner layers must be  
406 coordinated with expansion of outer layers, and our observation that in *Nicotiana*, uncontrolled  
407 vascular expansion leads to tissue lesions is a dramatic demonstration that this is the case (Figure 7).  
408 Evidence that mechanisms exist to adjust cellular parameters to maintain organisation include the  
409 observation that levels of cell expansion differs according to the levels of cell division, such that  
410 overall organ size in cell-division mutants is often comparable or, only subtly different to those of  
411 wild type plants (De Veylder et al., 2002; Hemerly et al., 1999; Shpak et al., 2004; Ullah et al., 2001).  
412 The idea that divisions in one cell layer can influence cell size and organisation in adjacent tissues  
413 also comes from experiments where the cell cycle has been manipulated in a cell-type specific  
414 manner. Expression of *KRP1* reduces cell division, and when specifically expressed in the epidermal  
415 cell layer results in concomitant changes to palisade cell size and density in leaves (Lehmeier et al.,  
416 2017).

417 So how does coordination between tissue layers occur? It was proposed some time ago that the *ERf*  
418 could perform this function (Shpak et al., 2004), and this initial suggestion has subsequently been  
419 supported by observations that endodermis derived EPFL ligands signal to ER in the phloem to  
420 regulate cell division in the adjacent procambium (Uchida et al., 2012; Uchida and Tasaka,  
421 2013)(Figure 1B). Our observation that ER represses *PXL* expression in the stem (Figure 1C, 8A)  
422 suggests that endodermis derived signals acting through ER can ultimately attenuate *PXF*-regulated  
423 vascular expansion. We also found that the *PXf* family of receptors, redundantly with *ER*, co-activate  
424 expression of *ERL* receptors and their *EPFL* ligands in the stem (Figures 2, S4, 8A). Thus coordination  
425 of vascular tissue expansion in stems occurs across multiple tissue layers via a series of feedback  
426 loops (Figure 8A). In *Nicotiana 35S::AtCLE41* lines divisions may go unchecked as we found no  
427 evidence of regulation of *PXY* by *ER*, so in the presence of very high quantities of TDIF considerable  
428 signalling could still occur through *PXY*.

429 In stems, the signalling components that are the focus of this study are expressed in discrete  
430 domains, but in the hypocotyl expression patterns of ER and PXY overlap to some extent on the  
431 xylem side of the cambium. A direct interaction between these receptors is therefore possible, but a  
432 recent global analysis of receptor kinase interactions found no evidence for direct interactions  
433 between ERf and PXf family members (Smakowska-Luzan et al., 2018). Our observation that *ERL*  
434 expression is de-repressed in the absence of *PXf* and *ER* in hypocotyls (Figure 2) supports the idea  
435 that these components interact, at least in part, at the level of gene expression. Perhaps the most  
436 striking of our findings was the observation that *ER* and *PXf* regulation of *ERL* expression in the  
437 hypocotyl occurred in a manner opposite to that observed in the stem. Here, *ER* and *PXf* combine to  
438 repress *ERL* expression, thus while *PXf* and *ERf* are required non-cell autonomously for tissue  
439 organisation and expansion in both stems and hypocotyls, the regulatory networks through which  
440 development is controlled differ in how they are wired (Figure 8). ERf activity in the epidermis has  
441 previously been reported to be buffered by a second receptor, TOO MANY MOUTHS (TMM). Loss of  
442 this buffering in *tmm* mutants leads to opposite stomatal spacing phenotypes in spatially separate  
443 cotyledon, where stomata cluster, compared to hypocotyls where stomata are absent. Differing  
444 ligand availability in cotyledon and hypocotyl is thought to account for this difference (Abrash et al.,  
445 2011). While EPFL4 and 6 have been demonstrated to act as ERf ligands in the inner tissues in stems,  
446 less is known about ligand expression pattern in hypocotyls. It remains to be determined whether

447 the difference in ERL regulation by *ER* and *PXf* in stem and hypocotyl could be due to differing  
448 complements of co-receptors and ligands in these differing locations.

449 In both stems and hypocotyls, tissue layers are arranged largely in concentric rings. However, in  
450 *Arabidopsis*, stem and hypocotyl differ in that the hypocotyl undergoes radial growth, but the vast  
451 majority of the stem does not. Radial hypocotyl growth is largely the consequence of expansion of a  
452 pattern that is laid down in the embryo, but in stems, *de novo* patterning must occur below the  
453 shoot apical meristem. In stems the epidermis, cortex and endodermal layers are maintained, but in  
454 hypocotyls they are lost. Nevertheless in both stem and hypocotyl, the xylem, (pro)cambium and  
455 phloem must be specified in adjacent tissue layers in a coordinated manner. Our mutant analysis  
456 demonstrates that *PXf* and *ERf* are central to maintaining this organisation (Figures 1, 5-6). The result  
457 of loss of this signalling, as determined by analysis of *pxf er* quadruple mutants is severe disruption  
458 to vascular pattern such that in stems, vascular tissue is no longer found in discrete bundles, but  
459 scattered around the stem adjacent to the endodermis (Figure 2). Removal of *PXf* and *ERf* families in  
460 hypocotyls results in prominent proliferation defects (Figure 6), but perhaps significantly, the ability  
461 to adjust cell size to compensate for the profound reductions in cell division (Figure 4) was also lost.  
462 This is in contrast to the consequences of losing the *ERECTA* family alone, as cell size adjustments are  
463 a feature of *erf* mutants (Shpak et al., 2004). Thus these observations support the idea that one  
464 function of the interaction between *ERf* and *PXf* is coordination of tissue expansion. We propose  
465 that with these signalling mechanisms removed, the positional information that must be interpreted  
466 for cell morphology adjustments to occur is missing.

467 In hypocotyls, the switch from primary to secondary growth is relatively unstudied, as are the events  
468 that occur in the rib zone below the shoot apical meristem where stem vascular tissues are formed.  
469 However, oriented cell divisions and the development of organ boundaries in the rib zone have been  
470 reported to be regulated by a homeodomain transcription factor, REPLUMLESS (RPL). Pertinent to  
471 the results obtained here, RPL was found to occupy the promoters of *PXY*, *CLE41*, *CLE42*, *ER*, *ERL1*,  
472 *ERL2*, and *CHAL* in CHIP-Seq experiments (Bencivenga et al., 2016). RPL is localised to the cytoplasm  
473 unless present in a heterodimer with class I KNOX protein, such as BREVIPEDICELLUS (Bhatt et al.,  
474 2004). *rpl bp* double mutants, particularly those in the *Ler* background that lacks a functional copy of  
475 *ER*, demonstrate considerable defects in vascular development (Etchells et al., 2012; Smith and  
476 Hake, 2003). Thus events in the rib zone, controlled by RPL could set up the initial pattern. Our  
477 genetic analysis demonstrates that however the pattern is initiated, it is maintained by interacting  
478 signalling pathways characterised by members of the *ERECTA* and *PXY* families. Such overlapping  
479 signals may be involved in coordinating growth in adjacent tissues in other developmental contexts.

480

#### 481 **Acknowledgements**

482 We thank Miguel de Lucas, Keith Lindsey, and Jen Topping for critical reading of the manuscript. The  
483 authors are grateful to Keiko Torii for sharing *er* and *erl* mutants, and *ERf* reporter lines, and to the  
484 Nottingham Arabidopsis Stock Centre for providing other genetic resources. This work was funded  
485 by the European Union (project number 329978 - Marie Skłodowska Curie Fellowship to JPE) and the  
486 BBSRC (grant number BB/H019928 to JPE and SRT and an NLD-DTP studentship to KSB, JPE and IHJ).  
487 The authors gratefully acknowledge a travel grant from Henan Agricultural University to NW.

488

#### 489 **Figure legends**

490 **Figure 1. Interaction between *PXf* and *ER*.** (A) Tissue types in the Arabidopsis stem. (B) Interactions  
491 between PXY and ER signalling are characterised by non-cell autonomous interactions. (C) qRT-PCR  
492 showing elevated expression of *PXL1* and *PXL2* in *er* mutants (expression normalised to *ACT2*). (D)  
493 Graph showing mean cells per vascular bundle. (E) Representation of vascular bundle arrangement  
494 (ratio of size along tangential/radial axes). (F-I) Transverse sections through wild type (F), *er* (G), *pxf*  
495 (H) and *pxf er* (I) stems. Arrows in (I) point to phloem distributed around the stem, rather than in  
496 discrete bundles. *p* values were calculated using a student's t-test (C), or ANOVA with an LSD post-  
497 hoc test (D). Scales (F-I) are 50  $\mu$ M. xy marks xylem; ph marks phloem.

498 **Figure 2. qRT-PCRs measuring *Erf* expression.** (A-C) Stem expression of *ERL1* (A), *ERL2* (B) and *ER* (C)  
499 in wild type, *er*, and *pxf* mutants in stems. Expression was normalised to 18S rRNA. (D-F) Expression  
500 of *ERL1* (D), *ERL2* (E) and *ER* (F) in hypocotyls (normalised to 18S rRNA). *p* values were calculated  
501 with ANOVA and LSD post-hoc test.

502 **Figure 3. *erl2* enhances *pxf er*.** (A-D) Transverse sections through *Arabidopsis* hypocotyls. (A) Wild  
503 type. (B) *pxf*. (C) *pxf er*. (D) *pxf er erl2*. (E) Box plot showing comparison of hypocotyl area of *pxf* and  
504 *er erl2* combinatorial mutants. *p* value was calculated with ANOVA and a Tukey post-hoc test. xy is  
505 xylem; ph is phloem; red arrowhead in (A) marks dividing cambium. Scales (A-D) are 50  $\mu$ M.

506 **Figure 4. Comparisons of hypocotyl cell morphology.** (A-D) Notched boxplots on left show mean  
507 area per xylem vessel (A), phloem cell (B), xylem fibres cell (C) and parenchyma cell (D). Notches  
508 show the 95% confidence level of the median. Histograms on right show the distributions of cell  
509 perimeters. Asterisks on the colour key mark where *pxf* perimeters were greater than those of *pxf er*  
510 *erl2* lines, i.e. xylem vessels, phloem, and parenchyma ( $p < 0.05$ ). For fibres,  $p = 0.053$ . Differences  
511 were calculated with ANOVA and a Tukey post-hoc test.

512 **Figure 5. Stem tissue from *pxf erf* lines.** (A) wild type, (B) *erf*, (C) *pxf*, (D) *pxf er erl2*, (E) *pxf erf*  
513 vascular bundles. Phloem arrangement is marked with red arrows. Cells with phloem cap-like  
514 morphology are marked with asterisks. Scales are 50  $\mu$ M; xv is xylem vessel, pc is procambium, ph is  
515 phloem, ph-c is phloem cap, en is endodermis.

516 **Figure 6. Transverse sections of hypocotyls from *pxf erf* lines.** (A) wild type, (B) *erf*, (C) *pxf*, (D) *pxf*  
517 *er erl2*, (E) *pxf erf* vascular tissue. Sites of phloem poles in *pxf erf* are marked with red arrows in left  
518 panel of (E). Red arrowheads in panels on right (A-E) align with cell divisions. Scales are 100  $\mu$ M on  
519 left, 50  $\mu$ M on right; xv is xylem vessel.

520 **Figure 7. Loss of coordinated expansion in *Nicotiana* lines with disrupted TDIF-PXY signalling.** Wild  
521 type *Nicotiana benthamiana* plants (A) compared to and *35S::AtCLE41* (B, C) lines showing stem  
522 lesions (red arrowhead). (D) Stem diameter of *35S::AtCLE41 Nicotiana* compared to wild type. (E-H)  
523 Transverse sections through *Nicotiana* stems. (E) and (F) show areas where lesions are apparent in  
524 *35S::AtCLE41*, (I) and (J) show cellular organisation in wild type compared to transgenic lines. Scales  
525 are 500  $\mu$ M (G, H) or 50  $\mu$ M (I, J).

526 **Figure 8. Model showing differences in gene expression regulation in stems and hypocotyls.** (A) In  
527 the stem, *ER* represses *PXL* gene expression. *PXf* and *ER* act as activators of *ERL* and *EPFL* gene  
528 expression. (B) In hypocotyls, negative regulation of *PXf* and *ER* targets predominate. Green arrows

529 show positive influence on gene expression; red blunt ended arrows show repression. Grey arrows  
530 show ligand-receptor interactions.

531

## 532 Literature Cited

533

- 534 **Abrash, E. B., Davies, K. A. and Bergmann, D. C.** (2011). Generation of Signaling Specificity in  
535 Arabidopsis by Spatially Restricted Buffering of Ligand–Receptor Interactions. *Plant Cell* **23**,  
536 2864-2879.
- 537 **Bae, S., Park, J. and Kim, J.-S.** (2014). Cas-OFFinder: a fast and versatile algorithm that searches for  
538 potential off-target sites of Cas9 RNA-guided endonucleases. *Bioinformatics* **30**, 1473-1475.
- 539 **Bemis, S. M., Lee, J. S., Shpak, E. D. and Torii, K. U.** (2013). Regulation of floral patterning and organ  
540 identity by Arabidopsis ERECTA-family receptor kinase genes. *J Exp Bot* **64**, 5323-5333.
- 541 **Bencivenga, S., Serrano-Mislata, A., Bush, M., Fox, S. and Sablowski, R.** (2016). Control of Oriented  
542 Tissue Growth through Repression of Organ Boundary Genes Promotes Stem  
543 Morphogenesis. *Developmental Cell* **39**, 198-208.
- 544 **Bhatt, A. M., Etchells, J. P., Canales, C., Lagodienko, A. and Dickinson, H.** (2004). VAAMANA--a  
545 BEL1-like homeodomain protein, interacts with KNOX proteins BP and STM and regulates  
546 inflorescence stem growth in Arabidopsis. *Gene* **328**, 103-111.
- 547 **Chaffey, N., Cholewa, E., Regan, S. and Sundberg, B.** (2002). Secondary xylem development in  
548 Arabidopsis: a model for wood formation. *Physiol Plant* **114**, 594-600.
- 549 **Clough, S. J. and Bent, A. F.** (1998). Floral dip: a simplified method for Agrobacterium-mediated  
550 transformation of Arabidopsis thaliana. *Plant Journal* **16**, 735-743.
- 551 **De Veylder, L., Beeckman, T., Beemster, G. T. S., Engler, J. D., Ormenese, S., Maes, S., Naudts, M.,  
552 Van der Schueren, E., Jacqmard, A., Engler, G., et al.** (2002). Control of proliferation,  
553 endoreduplication and differentiation by the Arabidopsis E2Fa-DPa transcription factor.  
554 *Embo J* **21**, 1360-1368.
- 555 **Dolan, L., Janmaat, K., Willemsen, V., Linstead, P., Poethig, S., Roberts, K. and Scheres, B.** (1993).  
556 CELLULAR-ORGANIZATION OF THE ARABIDOPSIS-THALIANA ROOT. *Development* **119**, 71-84.
- 557 **Efroni, I., Mello, A., Nawy, T., Ip, P.-L., Rahni, R., DelRose, N., Powers, A., Satija, R. and Birnbaum,  
558 K. D.** (2016). Root Regeneration Triggers an Embryo-like Sequence Guided by Hormonal  
559 Interactions. *Cell* **165**, 1721-1733.
- 560 **Etchells, J. P., Mishra, Laxmi S., Kumar, M., Campbell, L. and Turner, Simon R.** (2015). Wood  
561 Formation in Trees Is Increased by Manipulating PXY-Regulated Cell Division. *Current Biology*  
562 **25**, 1050-1055.
- 563 **Etchells, J. P., Moore, L., Jiang, W. Z., Prescott, H., Capper, R., Saunders, N. J., Bhatt, A. M. and  
564 Dickinson, H. G.** (2012). A role for BELLRINGER in cell wall development is supported by loss-  
565 of-function phenotypes. *BMC Plant Biol* **12**, 212.
- 566 **Etchells, J. P., Provost, C. M., Mishra, L. and Turner, S. R.** (2013). *WOX4* and *WOX14* act  
567 downstream of the PXY receptor kinase to regulate plant vascular proliferation  
568 independently of any role in vascular organisation. *Development* **140**, 2224-2234.
- 569 **Etchells, J. P. and Turner, S. R.** (2010). The PXY-CLE41 receptor ligand pair defines a multifunctional  
570 pathway that controls the rate and orientation of vascular cell division. *Development* **137**,  
571 767-774.
- 572 **Feng, X. and Dickinson, H. G.** (2010). Tapetal cell fate, lineage and proliferation in the Arabidopsis  
573 anther. *Development* **137**, 2409-2416.
- 574 **Fisher, K. and Turner, S.** (2007). PXY, a receptor-like kinase essential for maintaining polarity during  
575 plant vascular-tissue development. *Current Biology* **17**, 1061-1066.
- 576 **Hemerly, A. S., Ferreira, P. C. G., Van Montagu, M. and Inze, D.** (1999). Cell cycle control and plant  
577 morphogenesis: is there an essential link? *Bioessays* **21**, 29-37.
- 578 **Hirakawa, Y., Shinohara, H., Kondo, Y., Inoue, A., Nakanomyo, I., Ogawa, M., Sawa, S., Ohashi-Ito,  
579 K., Matsubayashi, Y. and Fukuda, H.** (2008). Non-cell-autonomous control of vascular stem

- 580 cell fate by a CLE peptide/receptor system. *Proceedings of the National Academy of Sciences,*  
581 *USA* **105**, 15208-15213.
- 582 **Horiguchi, G. and Tsukaya, H.** (2011). Organ Size Regulation in Plants: Insights from Compensation.  
583 *Frontiers in Plant Science* **2**.
- 584 **Horsch, R. B., Fry, J. E., Hoffmann, N. L., Eichholtz, D., Rogers, S. G. and Fraley, R. T.** (1985). A  
585 Simple and General Method for Transferring Genes into Plants. *Science* **227**, 1229-1231.
- 586 **Ikematsu, S., Tasaka, M., Torii, K. U. and Uchida, N.** (2017). ERECTA-family receptor kinase genes  
587 redundantly prevent premature progression of secondary growth in the Arabidopsis  
588 hypocotyl. *New Phytologist* **213**, 1697-1709.
- 589 **Ito, Y., Nakanomyo, I., Motose, H., Iwamoto, K., Sawa, S., Dohmae, N. and Fukuda, H.** (2006).  
590 Dodeca-CLE peptides as suppressors of plant stem cell differentiation. *Science* **313**, 842-845.
- 591 **Jia, G., Liu, X., Owen, H. A. and Zhao, D.** (2008). Signaling of cell fate determination by the TPD1  
592 small protein and EMS1 receptor kinase. *Proceedings of the National Academy of Sciences*  
593 **105**, 2220-2225.
- 594 **Kajala, K., Ramakrishna, P., Fisher, A., C. Bergmann, D., De Smet, I., Sozzani, R., Weijers, D. and**  
595 **Brady, S. M.** (2014). Omics and modelling approaches for understanding regulation of  
596 asymmetric cell divisions in arabidopsis and other angiosperm plants. *Annals of Botany* **113**,  
597 1083-1105.
- 598 **Kimura, Y., Tasaka, M., Torii, K. U. and Uchida, N.** (2018). ERECTA-family genes coordinate stem cell  
599 functions between the epidermal and internal layers of the shoot apical meristem.  
600 *Development* **145**.
- 601 **Kucukoglu, M., Nilsson, J., Zheng, B., Chaabouni, S. and Nilsson, O.** (2017). WUSCHEL-RELATED  
602 HOMEBOX4 (WOX4)-like genes regulate cambial cell division activity and secondary growth  
603 in Populus trees. *New Phytologist* **215**, 642-657.
- 604 **Lehmeier, C., Pajor, R., Lundgren Marjorie, R., Mathers, A., Sloan, J., Bauch, M., Mitchell, A.,**  
605 **Bellasio, C., Green, A., Bouyer, D., et al.** (2017). Cell density and airspace patterning in the  
606 leaf can be manipulated to increase leaf photosynthetic capacity. *The Plant Journal* **92**, 981-  
607 994.
- 608 **Ragni, L., Nieminen, K., Pacheco-Villalobos, D., Sibout, R., Schwechheimer, C. and Hardtke, C. S.**  
609 (2011). Mobile Gibberellin Directly Stimulates Arabidopsis Hypocotyl Xylem Expansion. *Plant*  
610 *Cell* **23**, 1322-1336.
- 611 **Ramakers, C., Ruijter, J. M., Deprez, R. H. L. and Moorman, A. F. M.** (2003). Assumption-free  
612 analysis of quantitative real-time polymerase chain reaction (PCR) data. *Neuroscience Letters*  
613 **339**, 62-66.
- 614 **Shpak, E. D., Berthiaume, C. T., Hill, E. J. and Torii, K. U.** (2004). Synergistic interaction of three  
615 ERECTA-family receptor-like kinases controls Arabidopsis organ growth and flower  
616 development by promoting cell proliferation. *Development* **131**, 1491-1501.
- 617 **Shpak, E. D., Lakeman, M. B. and Torii, K. U.** (2003). Dominant-negative receptor uncovers  
618 redundancy in the Arabidopsis ERECTA leucine-rich repeat receptor-like kinase signaling  
619 pathway that regulates organ shape. *Plant Cell* **15**, 1095-1110.
- 620 **Shpak, E. D., McAbee, J. M., Pillitteri, L. J. and Torii, K. U.** (2005). Stomatal Patterning and  
621 Differentiation by Synergistic Interactions of Receptor Kinases. *Science* **309**, 290-293.
- 622 **Smakowska-Luzan, E., Mott, G. A., Parys, K., Stegmann, M., Howton, T. C., Layeghifard, M.,**  
623 **Neuhold, J., Lehner, A., Kong, J., Grünwald, K., et al.** (2018). An extracellular network of  
624 Arabidopsis leucine-rich repeat receptor kinases. *Nature* **553**, 342.
- 625 **Smith, H. M. S. and Hake, S.** (2003). The Interaction of Two Homeobox Genes, BREVIPEDICELLUS and  
626 PENNYWISE, Regulates Internode Patterning in the Arabidopsis Inflorescence. *Plant Cell* **15**,  
627 1717-1727.
- 628 **Strabala, T. J., O'Donnell, P. J., Smit, A. M., Ampomah-Dwamena, C., Martin, E. J., Netzler, N.,**  
629 **Nieuwenhuizen, N. J., Quinn, B. D., Foote, H. C. C. and Hudson, K. R.** (2006). Gain-of-  
630 function phenotypes of many CLAVATA3/ESR genes, including four new family members,

- 631 correlate with tandem variations in the conserved CLAVATA3/ESR domain. *Plant Physiology*  
632 **140**, 1331-1344.
- 633 **ten Hove, C. A., Lu, K.-J. and Weijers, D.** (2015). Building a plant: cell fate specification in the early  
634 Arabidopsis embryo. *Development* **142**, 420-430.
- 635 **Torii, K. U., Mitsukawa, N., Oosumi, T., Matsuura, Y., Yokoyama, R., Whittier, R. F. and Komeda, Y.**  
636 (1996). The arabidopsis ERECTA gene encodes a putative receptor protein kinase with  
637 extracellular leucine-rich repeats. *Plant Cell* **8**, 735-746.
- 638 **Uchida, N., Lee, J. S., Horst, R. J., Lai, H.-H., Kajita, R., Kakimoto, T., Tasaka, M. and Torii, K. U.**  
639 (2012). Regulation of inflorescence architecture by intertissue layer ligand–receptor  
640 communication between endodermis and phloem. *Proc Natl Acad Sci USA*.
- 641 **Uchida, N., Shimada, M. and Tasaka, M.** (2013). ERECTA-Family Receptor Kinases Regulate Stem Cell  
642 Homeostasis via Buffering its Cytokinin Responsiveness in the Shoot Apical Meristem. *Plant*  
643 *Cell Physiol* **54**, 343-351.
- 644 **Uchida, N. and Tasaka, M.** (2013). Regulation of plant vascular stem cells by endodermis-derived  
645 EPFL-family peptide hormones and phloem-expressed ERECTA-family receptor kinases. *J Exp*  
646 *Bot*.
- 647 **Ullah, H., Chen, J.-G., Young, J. C., Im, K.-H., Sussman, M. R. and Jones, A. M.** (2001). Modulation of  
648 Cell Proliferation by Heterotrimeric G Protein in *Arabidopsis*. *Science* **292**, 2066-  
649 2069.
- 650 **Wang, Z.-P., Xing, H.-L., Dong, L., Zhang, H.-Y., Han, C.-Y., Wang, X.-C. and Chen, Q.-J.** (2015). Egg  
651 cell-specific promoter-controlled CRISPR/Cas9 efficiently generates homozygous mutants for  
652 multiple target genes in Arabidopsis in a single generation. *Genome Biology* **16**, 144.
- 653 **Wunderling, A., Ripper, D., Barra-Jimenez, A., Mahn, S., Sajak, K., Targem, M. B. and Ragni, L.**  
654 (2018). A molecular framework to study periderm formation in Arabidopsis. *New Phytologist*  
655 **0**.
- 656 **Xie, K., Zhang, J. and Yang, Y.** (2014). Genome-Wide Prediction of Highly Specific Guide RNA Spacers  
657 for CRISPR–Cas9-Mediated Genome Editing in Model Plants and Major Crops. *Mol Plant* **7**,  
658 923-926.
- 659 **Xing, H.-L., Dong, L., Wang, Z.-P., Zhang, H.-Y., Han, C.-Y., Liu, B., Wang, X.-C. and Chen, Q.-J.**  
660 (2014). A CRISPR/Cas9 toolkit for multiplex genome editing in plants. *BMC Plant Biol* **14**, 327.

661



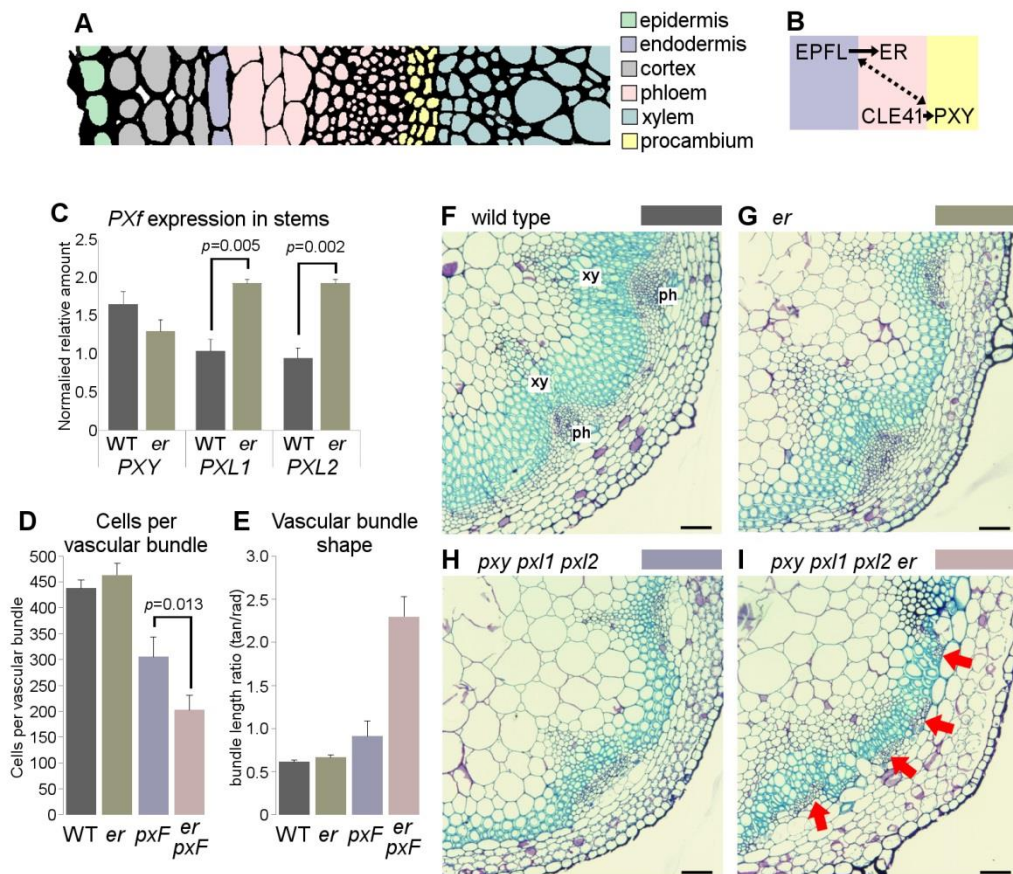

**Figure 1. Interaction between *PXf* and *ER*.** (A) Tissue types in the Arabidopsis stem. (B) Interactions between *PXY* and *ER* signalling are characterised by non-cell autonomous interactions. (C) qRT-PCR showing elevated expression of *PXL1* and *PXL2* in *er* mutants (expression normalised to *ACT2*). (D) Graph showing mean cells per vascular bundle. (E) Representation of vascular bundle arrangement (ratio of size along tangential/radial axes). (F-I) Transverse sections through wild type (F), *er* (G), *pxf* (H) and *pxf er* (I) stems. Arrows in (I) point to phloem distributed around the stem, rather than in discrete bundles. *p* values were calculated using a student's t-test (C), or ANOVA with an LSD post-hoc test (D). Scales (F-I) are 50  $\mu$ M. xy marks xylem; ph marks phloem.

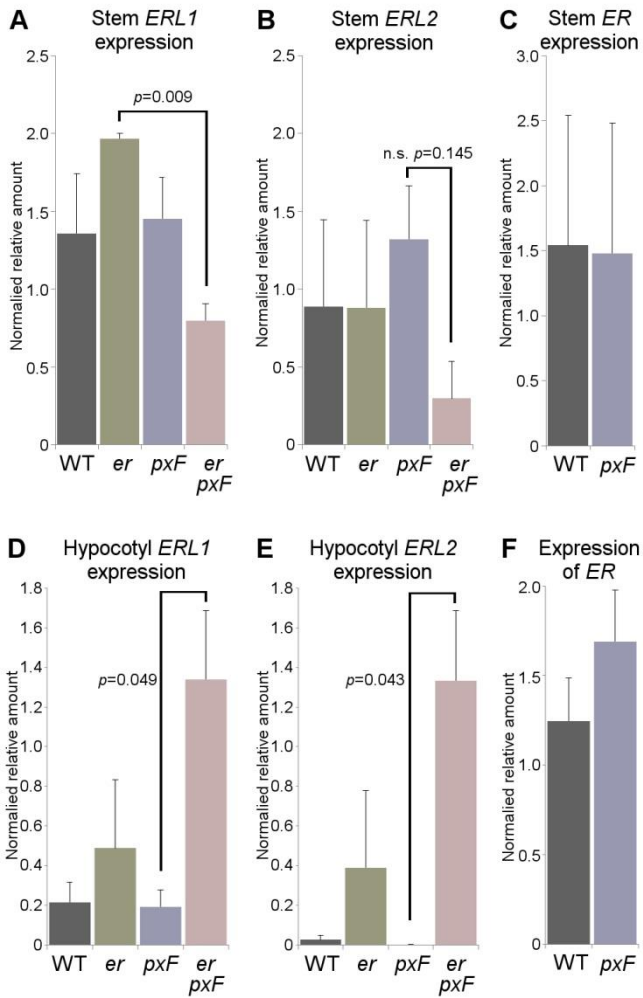

**Figure 2. qRT-PCRs measuring *ERf* expression.** (A-C) Stem expression of *ERL1* (A), *ERL2* (B) and *ER* (C) in wild type, *er*, and *pxf* mutants in stems. Expression was normalised to 18S rRNA. (D-F) Expression of *ERL1* (D), *ERL2* (E) and *ER* (F) in hypocotyls (normalised to 18S rRNA).  $p$  values were calculated with ANOVA and LSD post-hoc test.

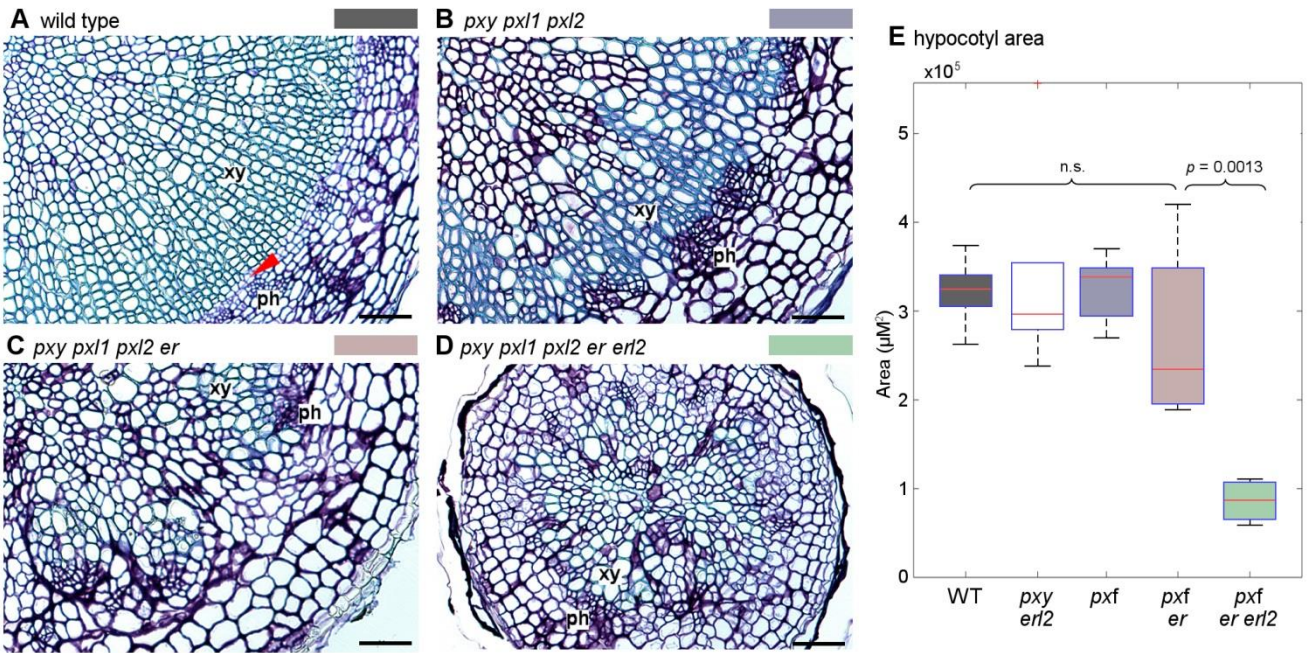

**Figure 3. *erl2* enhances *pxf er*.** (A-D) Transverse sections through *Arabidopsis* hypocotyls. (A) Wild type. (B) *pxf*. (C) *pxf er*. (D) *pxf er erl2*. (E) Box plot showing comparison of hypocotyl area of *pxf* and *er erl2* combinatorial mutants. *p* value was calculated with ANOVA and a Tukey post-hoc test. xy is xylem; ph is phloem; red arrowhead in (A) marks dividing cambium. Scales (A-D) are 50  $\mu\text{M}$ .

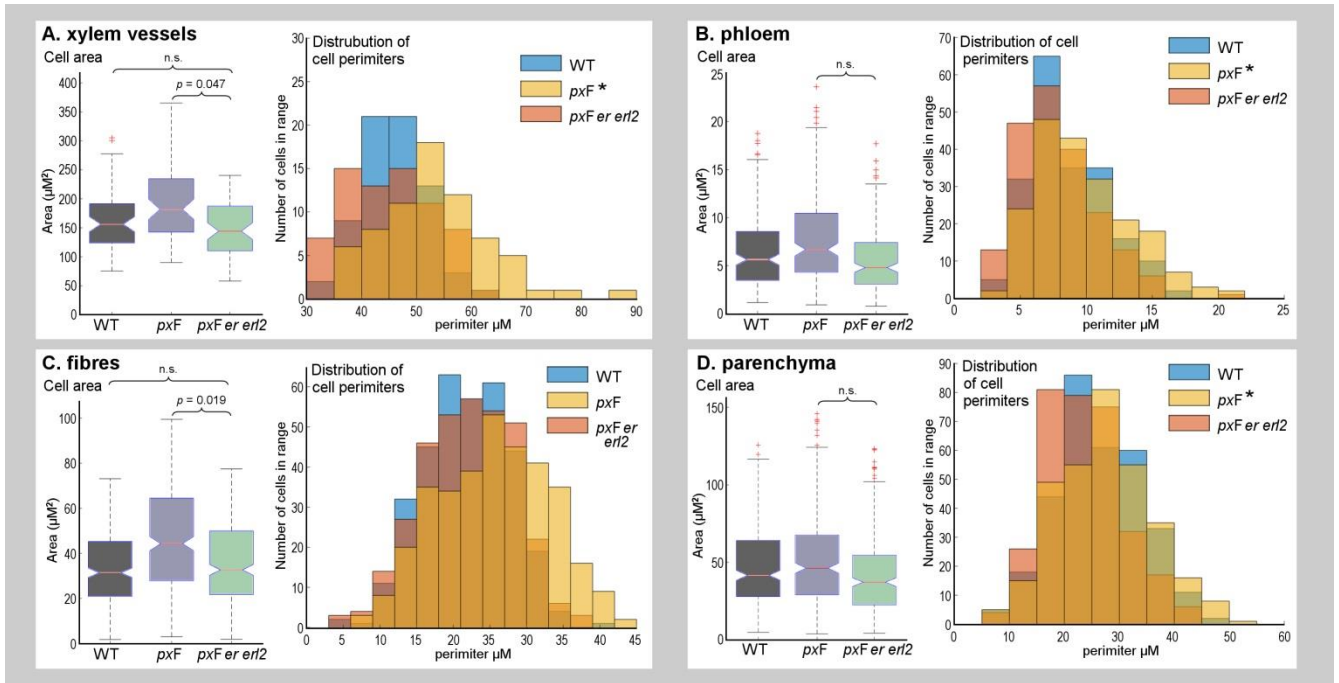

**Figure 4. Comparisons of hypocotyl cell morphology.** (A-D) Notched boxplots on left show mean area per xylem vessel (A), phloem cell (B), xylem fibres cell (C) and parenchyma cell (D). Notches show the 95% confidence level of the median. Histograms on right show the distributions of cell perimeters. Asterisks on the colour key mark where *pxF* perimeters were greater than those of *pxF erl2* lines, i.e. xylem vessels, phloem, and parenchyma ( $p < 0.05$ ). For fibres,  $p = 0.053$ . Differences were calculated with ANOVA and a Tukey post-hoc test.

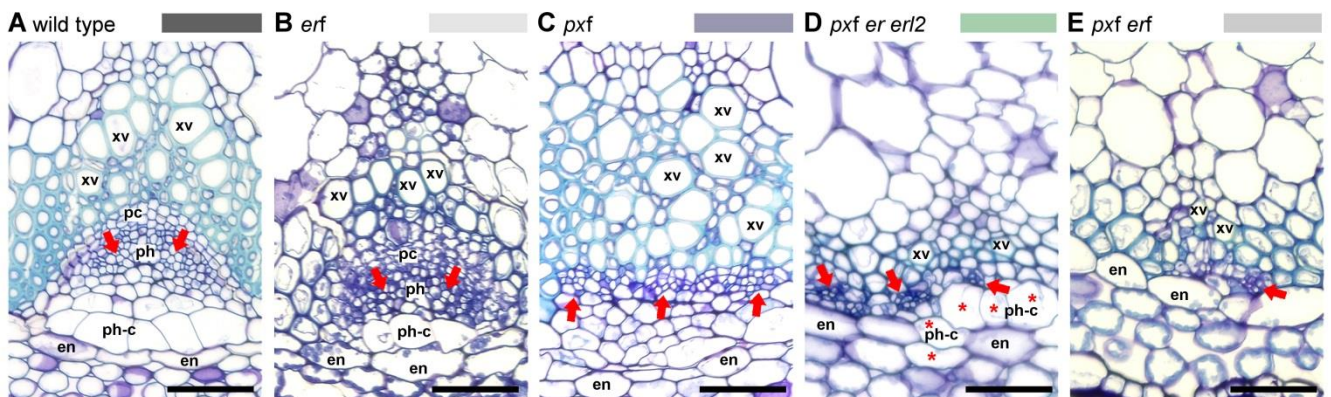

**Figure 5. Stem tissue from *pxF erf* lines.** (A) wild type, (B) *erf*, (C) *pxF*, (D) *pxF erl2*, (E) *pxF erf* vascular bundles. Phloem arrangement is marked with red arrows. Cells with phloem cap-like morphology are marked with asterisks. Scales are 50  $\mu\text{M}$ ; xv is xylem vessel, pc is procambium, ph is phloem, ph-c is phloem cap, en is endodermis.

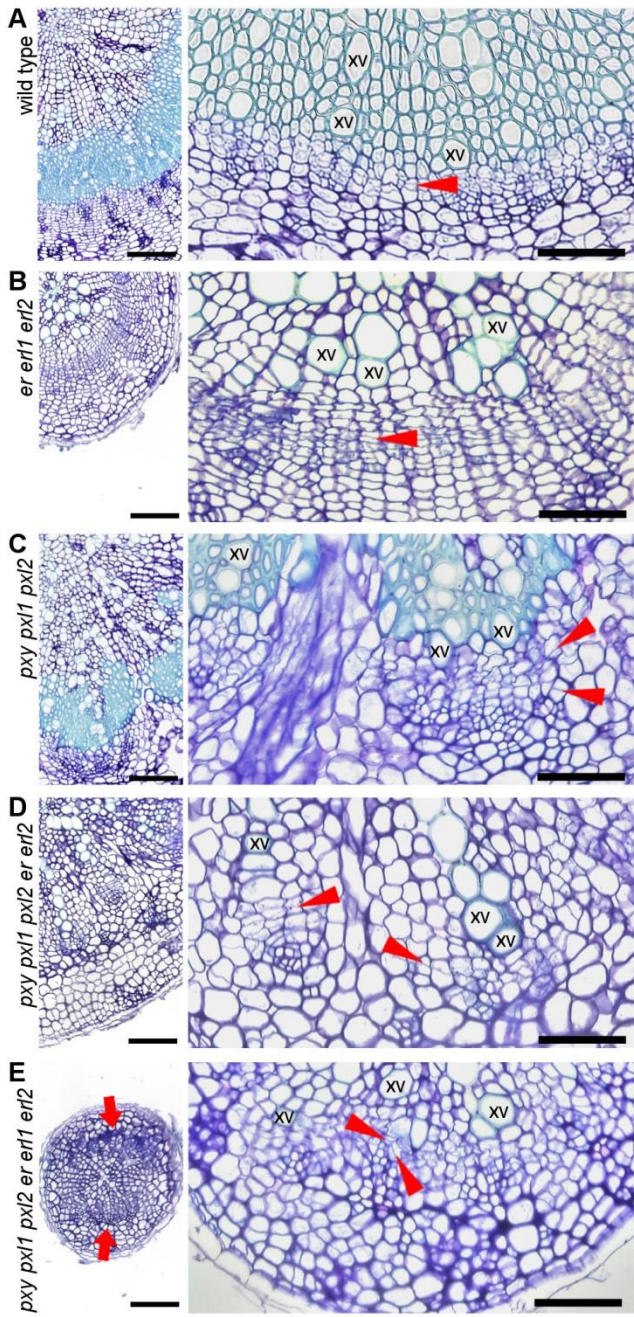

**Figure 6. Transverse sections of hypocotyls from *pxf erf* lines.** (A) wild type, (B) *erf*, (C) *pxf*, (D) *pxf erf1*, (E) *pxf erf* vascular tissue. Sites of phloem poles in *pxf erf* are marked with red arrows in left panel of (E). Red arrowheads in panels on right (A-E) align with cell divisions. Scales are 100  $\mu$ M on left, 50  $\mu$ M on right; xv is xylem vessel.

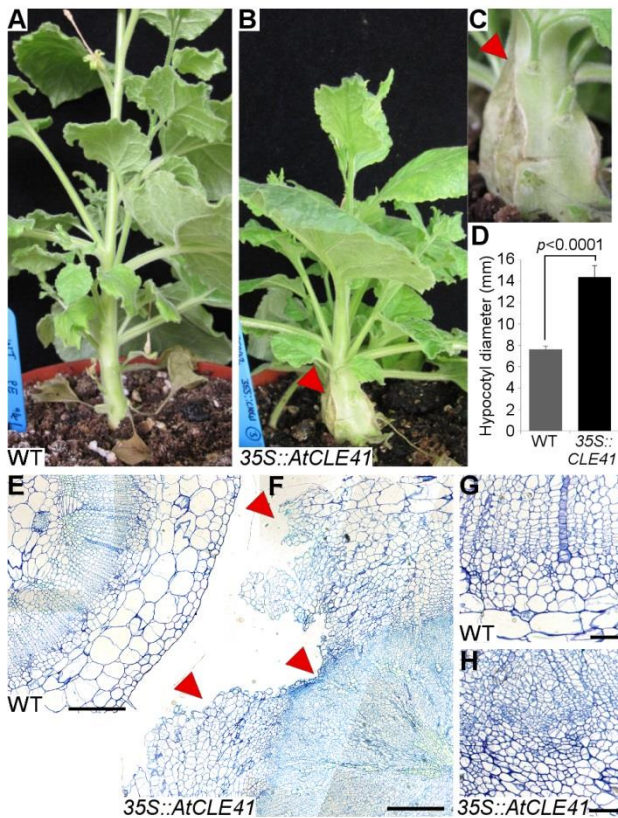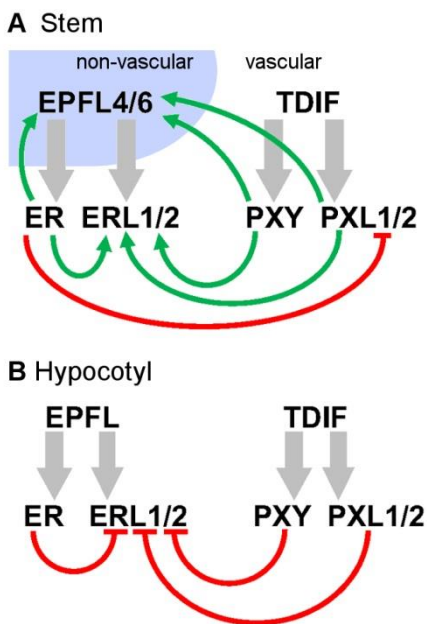

**Figure 8. Model showing differences in gene expression regulation in stems and hypocotyls.** (A) In the stem, *ER* represses *PXL* gene expression. *PXY* and *ER* act as activators of *ERL* and *EPFL* gene expression. (B) In hypocotyls, negative regulation of *PXY* and *ER* targets predominate. Green arrows show positive influence on gene expression; red blunt ended arrows show repression. Grey arrows show ligand-receptor interactions.
